# Supplementary material
Source: PubMed Central journal article supplement (PMC9725110)

## Supplementary Appendix

### **Azithromycin and Major Adverse Kidney Events in Critically Ill Patients with Sepsis-Associated Acute Kidney Injury**

Michael L. Behal, Jonny L. Nguyen, Xilong Li, David J. Feola,  
Javier A. Neyra, Alexander H. Flannery

**eTable 1.** Sensitivity Analysis Using 50% Reduction in eGFR for MAKE definition

**eTable 2.** Sensitivity Analysis Using Only Patients with Documented Baseline Serum Creatinine (n=345)

**eTable 3.** Sensitivity Analysis for Composite Outcome of Death or KRT at Discharge

**eTable 4.** Sensitivity Analysis for Primary Outcome Using Only KDIGO Stage 2 and 3 AKI (n=422)

**eFigure 1.** Range of Joint Relationships Capable of Explaining Away the Observed Effect of Azithromycin (E-value)

**eTable 1. Sensitivity Analysis Using 50% Reduction in eGFR for MAKE definition**

| <b>Variable</b>                             | <b>Odds Ratio (95% Confidence Interval)</b> | <b>p-value</b> |
|---------------------------------------------|---------------------------------------------|----------------|
| Azithromycin                                | 0.52 (0.34-0.80)                            | 0.003          |
| Age (years)                                 | 1.01 (1.00-1.03)                            | 0.077          |
| Sex (male vs. female)                       | 1.53 (1.09-2.15)                            | 0.013          |
| Baseline eGFR (ml/min/1.73 m <sup>2</sup> ) | 0.99 (0.98-1.00)                            | 0.094          |
| Diabetes                                    | 0.73 (0.50-1.05)                            | 0.087          |
| Hypertension                                | 0.65 (0.44-0.97)                            | 0.033          |
| Heart failure                               | 1.11 (0.76-1.63)                            | 0.594          |
| Liver disease                               | 1.97 (1.37-2.83)                            | <0.001         |
| Chronic kidney disease                      | 1.86 (1.22-2.84)                            | 0.004          |
| KDIGO AKI stage (vs. stage 1)               |                                             |                |
| Stage 2                                     | 0.88 (0.58-1.32)                            | 0.531          |
| Stage 3                                     | 1.30 (0.87-1.94)                            | 0.198          |
| Lactate (mmol/l)                            | 1.01 (0.97-1.05)                            | 0.721          |
| SOFA                                        | 1.14 (1.09-1.19)                            | <0.001         |
| Anti-pseudomonal antibiotic coverage        | 0.72 (0.49-1.05)                            | 0.090          |

eGFR=estimated glomerular filtration rate; KDIGO=Kidney Disease Improving Global Outcomes; SOFA=Sequential Organ Failure Assessment score

**eTable 2. Sensitivity Analysis Using Only Patients with Documented Baseline Serum Creatinine (n=345)**

| <b>Variable</b>                             | <b>Odds Ratio (95% Confidence Interval)</b> | <b>p-value</b> |
|---------------------------------------------|---------------------------------------------|----------------|
| Azithromycin                                | 0.79 (0.42-1.48)                            | 0.463          |
| Age (years)                                 | 1.00 (0.98-1.02)                            | 0.939          |
| Sex (male vs. female)                       | 1.52 (0.94-2.45)                            | 0.087          |
| Baseline eGFR (ml/min/1.73 m <sup>2</sup> ) | 0.99 (0.98-1.00)                            | 0.150          |
| Diabetes                                    | 0.70 (0.43-1.16)                            | 0.172          |
| Hypertension                                | 0.79 (0.44-1.43)                            | 0.438          |
| Heart failure                               | 0.99 (0.58-1.69)                            | 0.963          |
| Liver disease                               | 2.46 (1.47-4.11)                            | 0.001          |
| Chronic kidney disease                      | 1.88 (1.01-3.51)                            | 0.047          |
| KDIGO AKI stage (vs. stage 1)               |                                             |                |
| Stage 2                                     | 0.61 (0.34-1.11)                            | 0.107          |
| Stage 3                                     | 0.84 (0.47-1.50)                            | 0.546          |
| Lactate (mmol/l)                            | 1.06 (0.99-1.13)                            | 0.094          |
| SOFA                                        | 1.08 (1.02-1.15)                            | 0.008          |
| Anti-pseudomonal antibiotic coverage        | 0.72 (0.41-1.25)                            | 0.239          |

eGFR=estimated glomerular filtration rate; KDIGO=Kidney Disease Improving Global Outcomes; SOFA=Sequential Organ Failure Assessment score

**eTable 3. Sensitivity Analysis for Composite Outcome of Death or KRT at Discharge**

| <b>Variable</b>                             | <b>Odds Ratio (95% Confidence Interval)</b> | <b>p-value</b> |
|---------------------------------------------|---------------------------------------------|----------------|
| Azithromycin                                | 0.59 (0.38-0.91)                            | 0.018          |
| Age (years)                                 | 1.03 (1.01-1.04)                            | 0.001          |
| Sex (male vs. female)                       | 1.51 (1.06-2.15)                            | 0.023          |
| Baseline eGFR (ml/min/1.73 m <sup>2</sup> ) | 0.99 (0.98-1.00)                            | 0.020          |
| Diabetes                                    | 0.74 (0.50-1.08)                            | 0.123          |
| Hypertension                                | 0.47 (0.31-0.71)                            | <0.001         |
| Heart failure                               | 1.00 (0.67-1.50)                            | 0.982          |
| Liver disease                               | 2.04 (1.41-2.97)                            | <0.001         |
| Chronic kidney disease                      | 1.16 (0.75-1.80)                            | 0.491          |
| KDIGO AKI stage (vs. stage 1)               |                                             |                |
| Stage 2                                     | 0.91 (0.59-1.40)                            | 0.661          |
| Stage 3                                     | 0.93 (0.61-1.41)                            | 0.734          |
| Lactate (mmol/l)                            | 1.02 (0.98-1.07)                            | 0.263          |
| SOFA                                        | 1.14 (1.09-1.19)                            | <0.001         |
| Anti-pseudomonal antibiotic coverage        | 0.80 (0.54-1.19)                            | 0.276          |

eGFR=estimated glomerular filtration rate; KDIGO=Kidney Disease Improving Global Outcomes; SOFA=Sequential Organ Failure Assessment score

**eTable 4. Sensitivity Analysis for Primary Outcome Using Only KDIGO Stage 2 and 3 AKI (n=422)**

| <b>Variable</b>                             | <b>Odds Ratio (95% Confidence Interval)</b> | <b>p-value</b> |
|---------------------------------------------|---------------------------------------------|----------------|
| Azithromycin                                | 0.64 (0.36-1.13)                            | 0.126          |
| Age (years)                                 | 1.01 (1.00-1.03)                            | 0.120          |
| Sex (male vs. female)                       | 1.26 (0.83-1.90)                            | 0.280          |
| Baseline eGFR (ml/min/1.73 m <sup>2</sup> ) | 1.00 (0.99-1.01)                            | 0.954          |
| Diabetes                                    | 0.79 (0.50-1.24)                            | 0.307          |
| Hypertension                                | 0.71 (0.43-1.15)                            | 0.162          |
| Heart failure                               | 1.24 (0.75-2.06)                            | 0.401          |
| Liver disease                               | 1.78 (1.12-2.83)                            | 0.016          |
| Chronic kidney disease                      | 2.41 (1.40-4.14)                            | 0.001          |
| KDIGO AKI stage (stage 3 vs. stage 2)       | 1.40 (0.93-2.12)                            | 0.107          |
| Lactate (mmol/l)                            | 1.02 (0.98-1.07)                            | 0.344          |
| SOFA                                        | 1.04 (0.99-1.10)                            | 0.080          |
| Anti-pseudomonal antibiotic coverage        | 0.78 (0.47-1.29)                            | 0.328          |

eGFR=estimated glomerular filtration rate; KDIGO=Kidney Disease Improving Global Outcomes; SOFA=Sequential Organ Failure Assessment score

**eFigure 1. Range of Joint Relationships Capable of Explaining Away the Observed Effect of Azithromycin (E-value)**

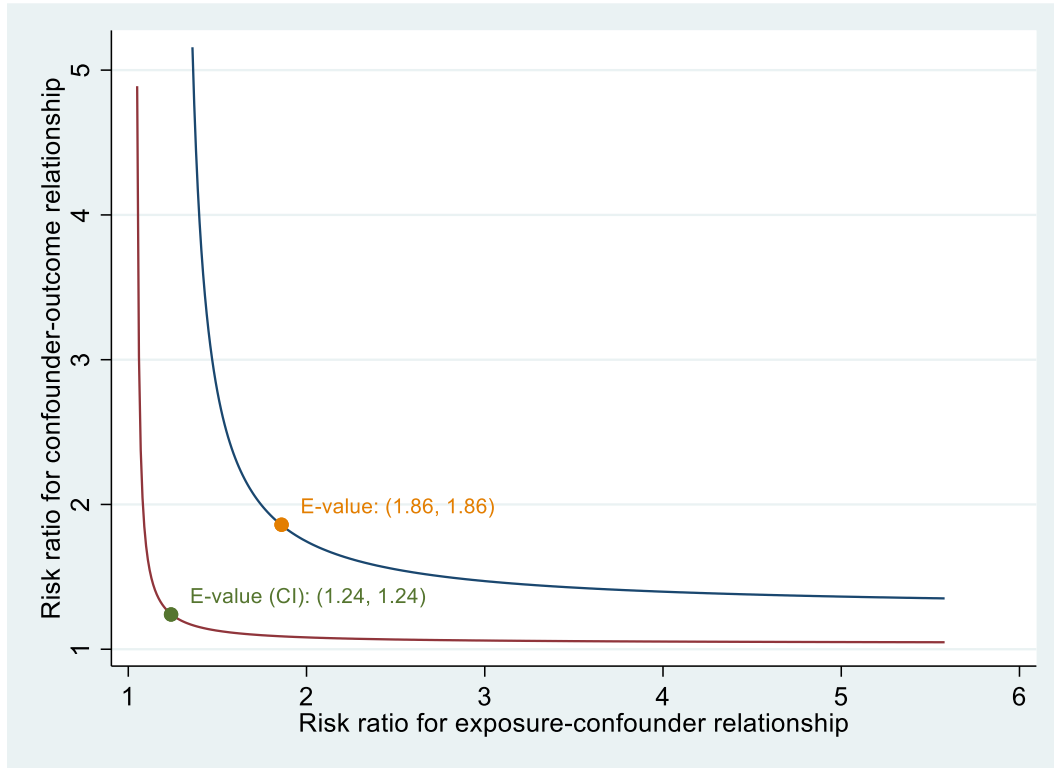

Supplement: NIHMS1854487-supplement-Supplemental_Digital_Content.pdf [file NIHMS1854487-supplement-Supplemental_Digital_Content.pdf]
